# Supplementary material for: Computational Study on DNA Repair: The Roles of Electrostatic Interactions Between Uracil-DNA Glycosylase (UDG) and DNA
Source: PubMed Central journal article supplement (PMC8377759; doi:10.3389/fmolb.2021.718587), 2021-08-06
Supplement: DataSheet1.pdf [file DataSheet1.pdf]

# Computational Study on DNA Repair: The Roles of Electrostatic Interactions Between Uracil-DNA Glycosylase (UDG) and DNA

Yixin Xie<sup>1</sup>, Chitra B. Karki<sup>1</sup>, Jiawei Chen<sup>2</sup>, Dongfang Liu<sup>3</sup>, Lin Li<sup>1,4\*</sup>

<sup>1</sup> Computational Science Program, University of Texas at El Paso, El Paso, TX

<sup>2</sup> Computer Science Program, Santa Monica College, Santa Monica, CA

<sup>3</sup> Department of Computer Engineering, Rochester Institute of Technology, Rochester, NY

<sup>4</sup> Department of Physics, University of Texas at El Paso, El Paso, TX

## \*Correspondence:

Lin Li: lli5@utep.edu

## 1 Sequences of UDG (chain A) and DNA (chain B and chain C):

```
>1EMH_3|Chain A |URACIL-DNA GLYCOSYLASE | Homo sapiens (9606)
MEFFGESWKKHLSGFEFGKPYFIKLMGFVAEERKHVTVYPPPHQVFTWTQMCDIKDVKV
VILGQDPYHGPNQAHGLCFVQRPVPPPPSLENIYKELSTDIEDFVHPGHGDLGSGWAKQG
VLLNAVLTVRAHQANSHKERGWEQFTDAVVSWLNQNSNGLVFLWGSYAQKKGSAI
DRKRHHVLQTAHPSPLSVYRGFFGCRHFSKTNELLQKSGKKPIDWKEL
>1EMH_1|Chain B |DNA (5'-D(*TP*GP*TP*(P2U) *AP*TP*CP*TP*T)-3') |
TGTUATCTT
>1EMH_2|Chain C |DNA (5'-D(*AP*AP*AP*GP*AP*TP*AP*AP*CP*A)-3') |
AAAGATAACA
```

## 2 Movies

Movie1: Electrostatic potential on surfaces of DNA

Movie2: Electrostatic potential on surfaces of UDG
